# Supplementary material for: Preliminary feasibility assessment of a targeted, pharmacist-led intervention for older adults with polypharmacy: a mixed-methods study
Source: Springer Nature journal article supplement (doi:10.1007/s11096-024-01740-y), 2024-05-16
Supplement: MOESM4 [file 27098976]

## **Supplementary Information**

**Article title:** Preliminary feasibility assessment of a targeted, pharmacist-led intervention for older adults with polypharmacy: a mixed-methods study

**Journal name:** International Journal of Clinical Pharmacy

**Author names:** Lisheng Liu<sup>1,2</sup>, Bernadette Brokenshire<sup>2</sup>, Deborah Davies<sup>2</sup>, Jeff Harrison<sup>1\*</sup>

**Affiliation:** <sup>1</sup> The University of Auckland, School of Pharmacy, Faculty of Medical and Health Sciences, Auckland, New Zealand. ORCID iD (Liu): 0000-0003-0280-4793, ORCID iD (Harrison): 0000-0001-8478-7469

<sup>2</sup> Te Whatu Ora, Primary, Public and Community Health, MidCentral District, Palmerston North, New Zealand.

**\*Corresponding author:** Email: jeff.harrison@auckland.ac.nz Postal: Private Bag 92019, Auckland 1142, New Zealand.

**Online Resource 4** Results from Attitudes Toward Collaboration Instrument for GPs questionnaire

| Question number         |                                                                                                                                                        | General practitioner |   |   |   |   |     |
|-------------------------|--------------------------------------------------------------------------------------------------------------------------------------------------------|----------------------|---|---|---|---|-----|
|                         |                                                                                                                                                        | A                    | B | C | D | E | F   |
| 1.                      | The professional communication between myself and the pharmacist is open and honest                                                                    | 4                    | 5 | 5 | 5 | 5 | 4   |
| 2.                      | The pharmacist is open to working together with me on patients' medication management                                                                  | 4                    | 5 | 5 | 5 | 5 | 5   |
| 3.                      | The pharmacist delivers high quality healthcare to patients                                                                                            | 4                    | 5 | 5 | 5 | 5 | 5   |
| 4.                      | The pharmacist has time to discuss with me matters relating to patients' medication regimens                                                           | 4                    | 5 | 5 | 5 | 5 | 4   |
| 5.                      | The pharmacist meets the professional expectations I have of him/her                                                                                   | 4                    | 5 | 5 | 5 | 5 | 5   |
| 6.                      | I trust the pharmacist's professional decisions                                                                                                        | 4                    | 5 | 5 | 5 | 5 | 5   |
| 7.                      | The pharmacist actively addresses patients' medical concerns                                                                                           | 4                    | 5 | 5 | 5 | 5 | 4   |
| 8.                      | The pharmacist and I have mutual respect for one another on a professional level                                                                       | 4                    | 5 | 5 | 5 | 5 | 4   |
| 9.                      | The pharmacist and I share common goals and objectives when caring for the patient                                                                     | 4                    | 5 | 5 | 5 | 5 | 4   |
| 10.                     | My role and the pharmacist's role in patient care are clear                                                                                            | 4                    | 5 | 5 | 5 | 5 | 4   |
| 11.                     | I have confidence in the pharmacist's expertise in medicines and therapeutics                                                                          | 4                    | 5 | 5 | 5 | 5 | 4   |
| 12.                     | The pharmacist has a role in assuring medication safety (for example, to identify drug interactions, adverse reactions, contraindications etc.)        | 4                    | 5 | 5 | 5 | 5 | 4   |
| 13.                     | The pharmacist has a role in assuring medication effectiveness (for example, to ensure the patient receives the optimal drug at the optimal dose etc.) | 4                    | 5 | 5 | 5 | 5 | 4   |
| <b>Summative scores</b> |                                                                                                                                                        | 4                    | 5 | 5 | 5 | 5 | 4.3 |

Respondents were requested to indicate the extent to which they agree or disagree with the statements, where 1 = 'strongly disagree' and 5 = 'strongly agree'.
