# Supplementary material for: Preliminary feasibility assessment of a targeted, pharmacist-led intervention for older adults with polypharmacy: a mixed-methods study
Source: Springer Nature journal article supplement (doi:10.1007/s11096-024-01740-y), 2024-05-16
Supplement: MOESM5 [file 27098976]

## **Supplementary Information**

**Article title:** Preliminary feasibility assessment of a targeted, pharmacist-led intervention for older adults with polypharmacy: a mixed-methods study

**Journal name:** International Journal of Clinical Pharmacy

**Author names:** Lisheng Liu<sup>1,2</sup>, Bernadette Brokenshire<sup>2</sup>, Deborah Davies<sup>2</sup>, Jeff Harrison<sup>1\*</sup>

**Affiliation:** <sup>1</sup> The University of Auckland, School of Pharmacy, Faculty of Medical and Health Sciences, Auckland, New Zealand. ORCID iD (Liu): 0000-0003-0280-4793, ORCID iD (Harrison): 0000-0001-8478-7469

<sup>2</sup> Te Whatu Ora, Primary, Public and Community Health, MidCentral District, Palmerston North, New Zealand.

**\*Corresponding author:** Email: jeff.harrison@auckland.ac.nz Postal: Private Bag 92019, Auckland 1142, New Zealand.

**Online Resource 5** Participant LMQ-3 results at initial appointment and at eight-week follow-up

| Participant (initial /follow-up appointment) | LMQ-3 Domain 1 | LMQ-3 Domain 2 | LMQ-3 Domain 3 | LMQ-3 Domain 4 | LMQ-3 Domain 5 | LMQ-3 Domain 6 | LMQ-3 Domain 7 | LMQ-3 Domain 8 | Total LMQ-3 score | Total LMQ-3 score categorised |
|----------------------------------------------|----------------|----------------|----------------|----------------|----------------|----------------|----------------|----------------|-------------------|-------------------------------|
| A - initial                                  | 9              | 12             | 11             | 5              | 13             | 15             | 10             | 14             | 89                | Moderate burden               |
| A – follow-up                                | 8              | 13             | 11             | 8              | 10             | 18             | 18             | 12             | 98                | Moderate burden               |
| B – initial                                  | 7              | 16             | 5              | 7              | 17             | 13             | 11             | 11             | 87                | Low burden                    |
| B – follow-up                                | 10             | 14             | 6              | 8              | 13             | 17             | 15             | 12             | 95                | Moderate burden               |
| C – initial                                  | 9              | 21             | 11             | 11             | 14             | 25             | 15             | 9              | 115               | High burden                   |
| C – follow-up                                | 10             | 18             | 11             | 8              | 14             | 23             | 18             | 6              | 108               | Moderate burden               |
| D – initial                                  | 5              | 8              | 3              | 4              | 8              | 17             | 12             | 15             | 72                | Low burden                    |
| D – follow-up                                | 10             | 12             | 5              | 7              | 12             | 12             | 13             | 14             | 85                | Low burden                    |
| E – initial                                  | 9              | 15             | 11             | 7              | 12             | 18             | 19             | 12             | 103               | Moderate burden               |
| E – follow-up                                | 10             | 12             | 10             | 8              | 10             | 21             | 12             | 10             | 93                | Moderate burden               |
| F – initial                                  | 8              | 14             | 8              | 11             | 10             | 20             | 18             | 7              | 96                | Moderate burden               |
| F – follow-up                                | N/A            | N/A            | N/A            | N/A            | N/A            | N/A            | N/A            | N/A            | N/A               | N/A                           |
| G – initial                                  | 6              | 12             | 6              | 11             | 9              | 17             | 8              | 8              | 77                | Low burden                    |
| G – follow-up                                | 5              | 17             | 3              | 5              | 8              | 20             | 8              | 8              | 74                | Low burden                    |
| H – initial                                  | 10             | 20             | 9              | 12             | 14             | 21             | 19             | 7              | 112               | High burden                   |
| H – follow-up                                | 10             | 14             | 6              | 8              | 11             | 15             | 16             | 10             | 90                | Moderate burden               |
| I – initial                                  | 6              | 23             | 12             | 12             | 11             | 30             | 21             | 3              | 118               | High burden                   |
| I – follow-up                                | 5              | 16             | 6              | 8              | 10             | 19             | 17             | 9              | 90                | Moderate burden               |
| J – initial                                  | 14             | 19             | 7              | 8              | 10             | 15             | 14             | 12             | 99                | Moderate burden               |
| J – follow-up                                | 9              | 10             | 5              | 6              | 11             | 13             | 10             | 15             | 79                | Low burden                    |

Total LMQ-3 score categories: score 41 – 87 = low burden, score 88 – 110 = moderate burden, score > 110 = high burden.

Abbreviations: LMQ-3, Living with Medicines Questionnaire version 3.

Participant LMQ-3 visual analogue scale results at initial appointment and eight-week follow-up

| <b>Participant (initial /follow-up appointment)</b> | <b>LMQ-3 visual analogue scale score</b> | <b>LMQ-3 visual analogue scale score categorised</b> |
|-----------------------------------------------------|------------------------------------------|------------------------------------------------------|
| A – initial                                         | 0                                        | Minimal/no burden                                    |
| A – follow-up                                       | 1                                        | Minimal/no burden                                    |
| B – initial                                         | 3.5                                      | Minimal/no burden                                    |
| B – follow-up                                       | 0.5                                      | Minimal/no burden                                    |
| C – initial                                         | 5                                        | Some degree of burden                                |
| C – follow-up                                       | 2.5                                      | Minimal/no burden                                    |
| D – initial                                         | 0                                        | Minimal/no burden                                    |
| D – follow-up                                       | 0                                        | Minimal/no burden                                    |
| E – initial                                         | 7                                        | High degree of burden                                |
| E – follow-up                                       | 1                                        | Minimal/no burden                                    |
| F – initial                                         | 6.5                                      | High degree of burden                                |
| F – follow-up                                       | N/A                                      | N/A                                                  |
| G – initial                                         | 4                                        | Some degree of burden                                |
| G – follow-up                                       | 5                                        | Some degree of burden                                |
| H – initial                                         | 1                                        | Minimal/no burden                                    |
| H – follow-up                                       | 0                                        | Minimal/no burden                                    |
| I – initial                                         | 8                                        | High degree of burden                                |
| I – follow-up                                       | 0                                        | Minimal/no burden                                    |
| J – initial                                         | 0                                        | Minimal/no burden                                    |
| J – follow – up                                     | 0                                        | Minimal/no burden                                    |

LMQ-3 visual analogue scale score categories: score 4.0 or lower = minimal/no burden, score 4.1 to 5.9 = some degree of burden, score 6.0 or higher = high degree of burden.

Abbreviations: LMQ-3, Living with Medicines Questionnaire version 3.
